# Supplementary material for: Enhanced cycle performance of ultraflexible asymmetric supercapacitors based on a hierarchical MnO2@NiMoO4 core–shell nanostructure and porous carbon
Source: Royal Society of Chemistry journal article supplement (doi:10.1039/c6ta07836b), 2016-01-01
Supplement: c6ta07836b1.pdf [file c6ta07836b1.pdf]

## Supporting Information

# Enhanced cycle performance of ultraflexible asymmetric supercapacitors based on hierarchical $\text{MnO}_2@\text{NiMoO}_4$ core-shell nanostructure and porous carbon

XiuhuaWang<sup>a\*</sup>, HouyongXia<sup>a</sup>, JieGao<sup>a</sup>, Bo Shi<sup>a</sup>, Yao Fang<sup>a</sup>, MingwangShao<sup>b\*</sup>

<sup>a</sup>Anhui Key Laboratory of Molecule-Based Materials, The Key Laboratory of Functional Molecular Solids, Ministry of Education, College of Chemistry and Materials Science, Anhui Normal University, Wuhu 241000, China

<sup>b</sup>Institute of Functional Nano & Soft Materials (FUNSOM), Jiangsu Key Laboratory for Carbon-based Functional Materials and Devices, Soochow University, Suzhou 215123, P. R. China

\*Correspondence - mwshao@suda.edu.cn

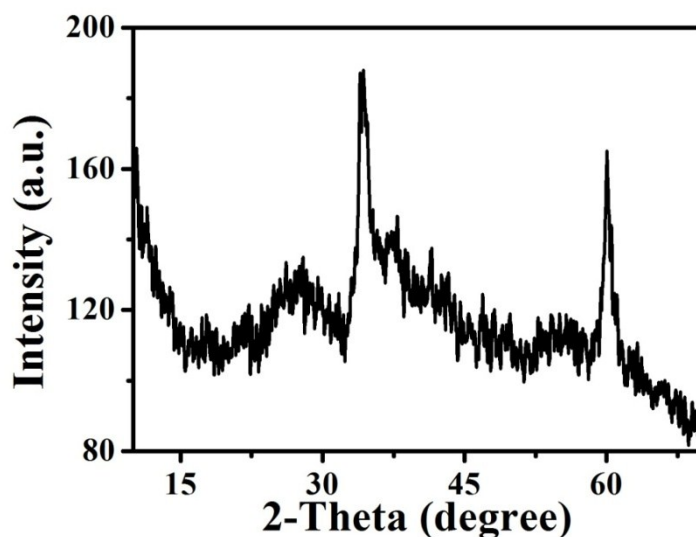

Figure S1.XRD pattern of NiMoO<sub>4</sub>.

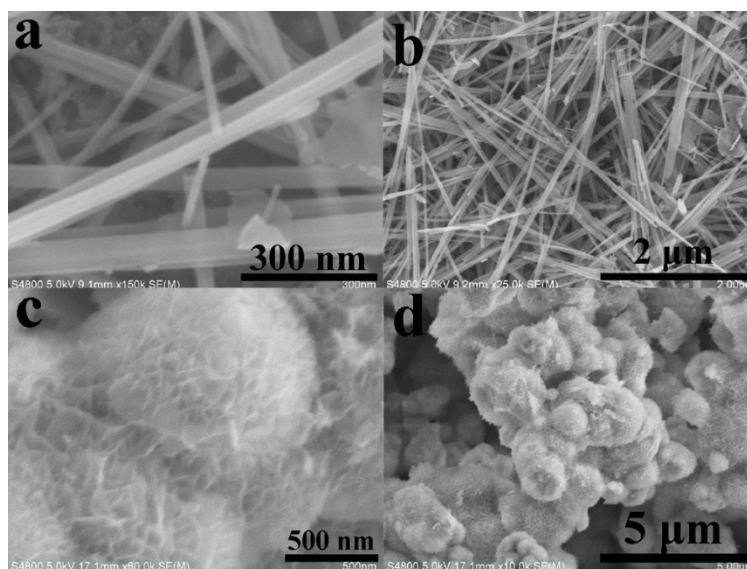

Figure S2.(a) and (b) FESEM images of the precursor of MnO<sub>2</sub> nanowires in the high and low magnification, (c) and (d) FESEM images of NiMoO<sub>4</sub> nanoflakes in the high and low magnification.

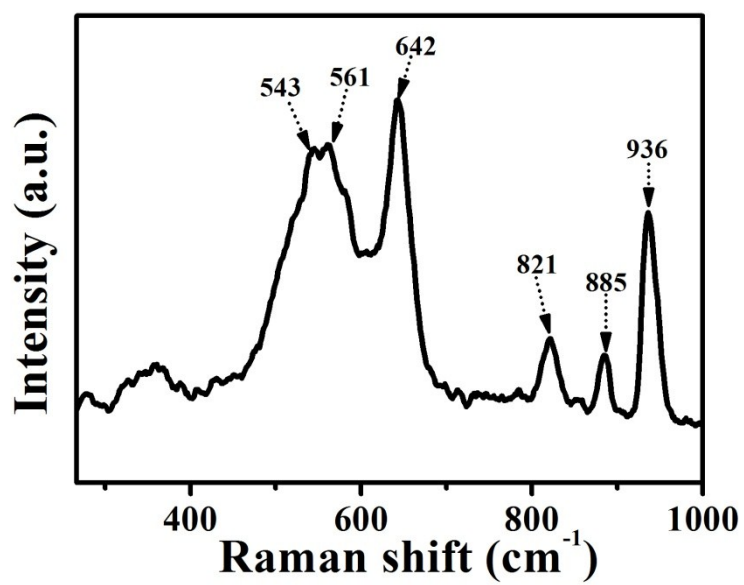

Figure S3. Raman spectrum of  $\text{MnO}_2@\text{NiMoO}_4$ .

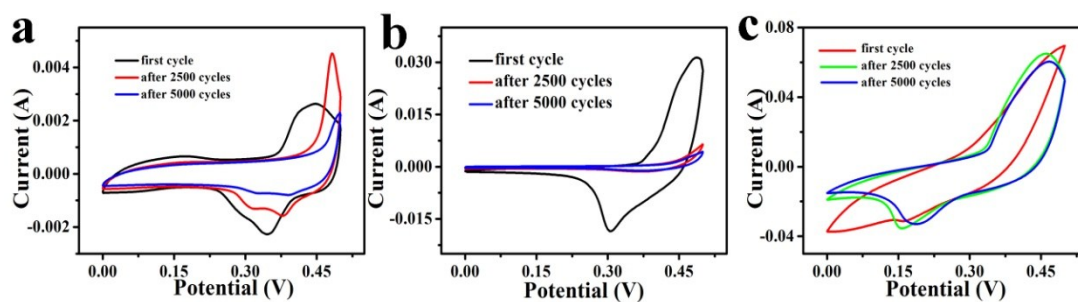

Figure S4. The CV curves of the (a)  $\text{MnO}_2$ , (b)  $\text{NiMoO}_4$  and (c)  $\text{MnO}_2@\text{NiMoO}_4$  supercapacitor at 1, 2500, and 5000 cycles.

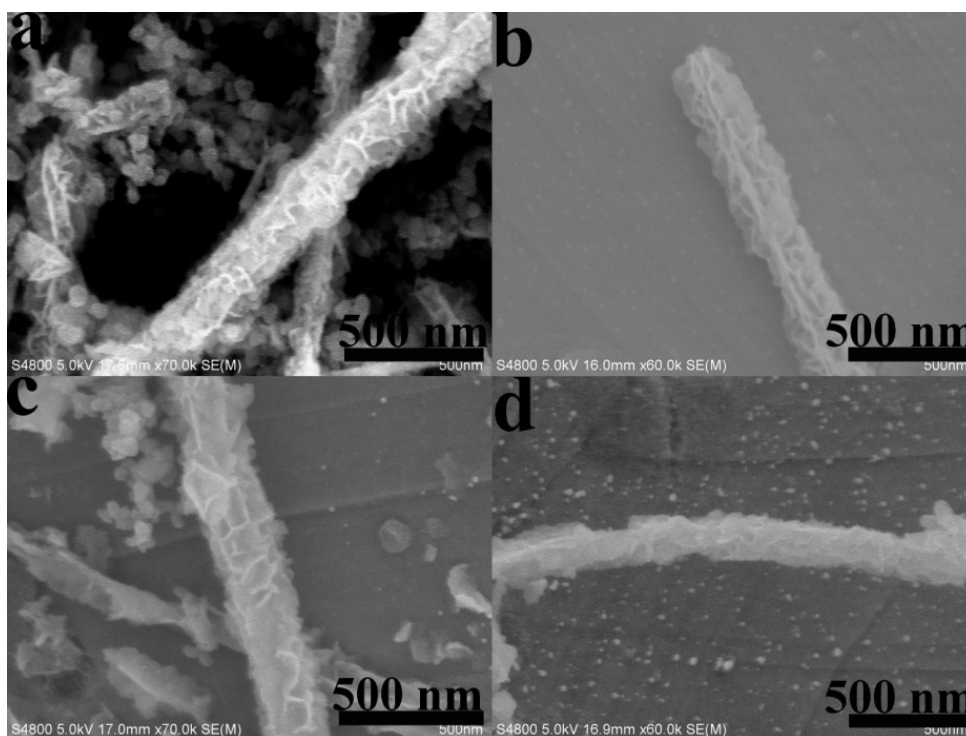

Figure S5. FESEM images of  $\text{MnO}_2@\text{NiMoO}_4$  electrode materials based on Ni foam substrate (a) without cycles test; (b), (c) and (d) after 2000, 3000 and 5000 cycles test, respectively.

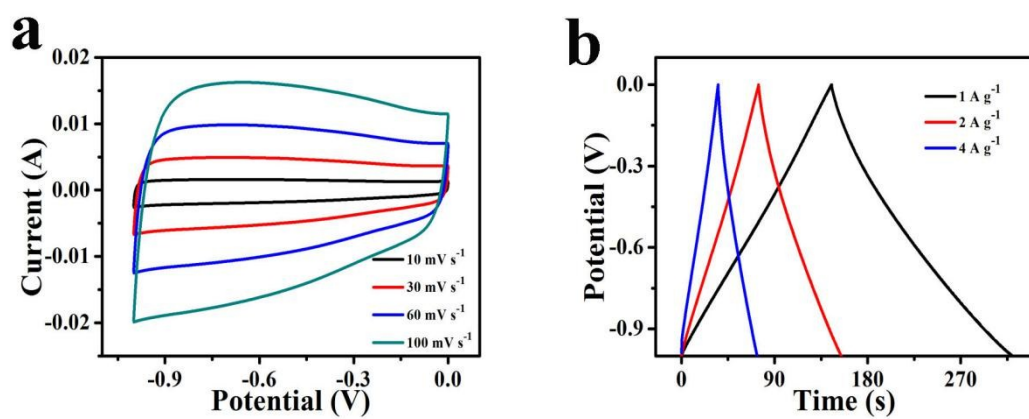

Figure S6. (a) CV curves of porous carbon; and (b) Charge-discharge curves of porous carbon.
